# Supplementary material for: Zebrafish ambra1b knockout reveals a novel role for Ambra1 in primordial germ cells survival, sex differentiation and reproduction
Source: PubMed Central journal article supplement (PMC10142490; doi:10.1186/s40659-023-00430-9), 2023-04-28
Supplement: 40659_2023_430_MOESM2_ESM.pdf [file 40659_2023_430_MOESM2_ESM.pdf]

| Species             | Use                | Gene                          | Sequence                    | Accession number |
|---------------------|--------------------|-------------------------------|-----------------------------|------------------|
| <i>Mus musculus</i> | RT-qPCR            | <i>Gapdh-F</i>                | 5'-ATCCTGCACCACCAACTGCT-3'  | NG_047186.1      |
|                     |                    | <i>Gapdh-R</i>                | 5'-GGGCCATCCACAGTCTTGTG-3'  |                  |
|                     |                    | <i>Ambra1-F</i>               | 5'-CTGCCTGATAGTCCACGCTC-3'  | NM_172669        |
|                     |                    | <i>Ambra1-R</i>               | 5'-TGTGTGGATGCCAAGAGAGTC-3' |                  |
|                     |                    | <i>Stat3-F</i>                | 5'-CGAAAGTCAGTTGCTGGTC-3'   | NM_011486        |
|                     |                    | <i>Stat3-R</i>                | 5'-CTCTGAGGGCAGCAACATC-3'   |                  |
|                     | Genotyping         | <i>c-Myc-F</i>                | 5'-AGGCGGACACACAACGTCTT-3'  | NM_001177353.1   |
|                     |                    | <i>c-Myc R</i>                | 5'-TGCTCGTCTTGAATGGA-3'     |                  |
|                     |                    | <i>Ambra1 KO-F</i>            | 5'-TGATAGTCCACGCTCGACCT-3'  | NM_172669.3      |
|                     |                    | <i>Ambra1 KO-R</i>            | 5'-TGAACATTCCAGCTTGGTGC-3'  |                  |
| Genotyping          | <i>Ambra1 WT-F</i> | 5'-TCTGGTTGCTAGATGGGGA-3'     | NM_172669.3                 |                  |
|                     | <i>Ambra1 WT-R</i> | 5'-ACTCATGTTAGAGCCTCCTGC-3'   |                             |                  |
| <i>Danio rerio</i>  | RT-qPCR            | <i>atb2-F</i>                 | 5'-TGGGTATGGAATCTTGCGGT-3'  | NM_181601.5      |
|                     |                    | <i>atb2-R</i>                 | 5'-GTGGGGCAATGATCTTGATC-3'  |                  |
|                     |                    | <i>ambra1a-F</i>              | 5'-TCTGTGGGACTGGAGTCG-3'    | NM_001281992     |
|                     |                    | <i>ambra1a-R</i>              | 5'-AGCGCTGTCGGAGATGAG-3'    |                  |
|                     | Genotyping         | <i>ambra1b-F</i>              | 5'-AGGTGACGGACAGTCAGC-3'    | NM_001302220     |
|                     |                    | <i>ambra1b-R</i>              | 5'-CCTACCATCACATAGCAGC-3'   |                  |
|                     |                    | <i>ambra1a-F</i>              | 5'-TGGCTGCCTGGATGGAGAG-3'   | NM_001281992.1   |
|                     |                    | <i>ambra1a-R</i>              | 5'-GGTGCAAAAGTTGCCGTAAT-3'  |                  |
| Genotyping          | <i>ambra1b-F</i>   | 5'-GAAACTCTGTGCTGATCCTGT-3'   | NM_001302220.1              |                  |
|                     | <i>ambra1b-R</i>   | 5'-GGCTTTAAACAATTATATGCTGC-3' |                             |                  |

**Table A1:** Mice and zebrafish primers used in this work.
